# Supplementary material for: 100 years of anthropogenic impact causes changes in freshwater functional biodiversity
Source: bioRxiv preprint, doi:10.1101/2023.02.26.530075, version 2 (2023-06-21)
Supplement: Supplementary table 4 [file 530075_file04.xlsx]

## Sheet: Lake ring metadata
Sample information			climate data														Chemical name	1,2-dichloropropane	1,3-dichloropropene	2-(thiocyanomethylthio)-benzothiazol	2,2-dibromo-2-cyanoacetamide	2,3,6-TBA	2,3-dihydro-6-methyl-5-phenylcarbamoyl-1,4-oxathiin	2,4,5-T	2,4-D	2-bromo-2-nitropropane-1,3-diol	2-ethylhexane-1,3-diol	2-methyl-4-isothiazolin-3-on	3-iodo-2-propynylbutyl-carbamate	4,5,2',4',6'-pentachloro-2-(chlormethylsulfonamide)-diphenylether-Na	5-benzyl-3-furylmethyl(+)cis-(1R,3S,E)-2,2-	5-chloro-2-methyl-4-isothiazolin-3-on	acephate	Acetamiprid	aclonifen	alachlor	aldicarb	alloxydim-sodium	allylalcohol	alpha-cypermethrin	amidosulfuron	Amitraz	amitrol	ammonium ethyl carbamoylphosphate	ammonium-, potassium-or sodium- dichromate	ammonium-ethylene-bis(dithiocarbamate)	ancymidol	asulam	atrazine
year	SampleID	Depth(cm)	annual mean temperature °C	summer mean temperature °C	mean minimum temperature °C	mean maximum temperature °C	highest recorded temperature °C	lowest recorded temperature °C	mean atmospheric pressure hPa	summer mean atmospheric presure hPa	annual total precipitation mm	summer precipitation mm	maximum daily precipitation mm	No. of days with snow cover (> 50% covered)	annual mean cloud cover %	summer mean cloud cover %	Class	Insecticide	Insecticide	Fungicide	Fungicide	Herbicide	Fungicide	Herbicide	Herbicide	Fungicide	Insecticide	Fungicide	Fungicide	Fungicide	Insecticide	Fungicide	Insecticide	Insecticide	Herbicide	Herbicide	Insecticide	Herbicide	Herbicide	Insecticide	Herbicide	Insecticide	Herbicide	Insecticide	Fungicide	Fungicide	Herbicide	Herbicide	Herbicide
2015	2	0.5 - 1.0																							16748.6									1531.2	18761.5					28								3232
2013	4	1.5 - 2.0	8.64167	15.3	6.19167	11.2583	27.4	-11.9	1013.15	1012.7	611.8	250.6	52.3	29	na	na									10627									813.6	25428					4463.8								3726
2011	6	2.5 - 3.0	9.29167	16.3667	6.76667	12.05	25.8	-5.3	1014.43	1012.7	597.5	310	27.6	17	na	na									13150									435.5	21348					2993	0							1600
2010	8	3.5 - 4.0	7.58333	16.6	5.08333	10.075	27.1	-9.1	1012.52	1011.4	642.9	264.5	33.4	70	na	na									1158.2				1639					93.6	10527					1339	0							2424
2008	10	4.5 - 5.0	9.85	16.6333	7.28333	12.475	28.1	-4.6	1012.42	1013.4	468.2	155.8	31	2	na	na									3756	71			2003					67	27672					5677	0							3968
2006	12	5.5 - 6.0	9.675	17.6667	7.15	12.3833	27.9	-7.2	1014.08	1013.4	576.8	180.7	19	31	na	na					0					0			3484						23724					2073	225							3360
2004	14	6.5 - 7.0	8.91	15.6	6.475	11.5833	26.1	-7.4	1012.8	1014.03	640.9	201.2	26.2	-9999	na	na					0		60			32675			3058					0	22410					1242	280							3000
2002	16	7.5 - 8.0	9.67	17.93	6.88333	13.0167	28.8	-7.5	1013.8	1014.43	666.3	267.5	70.5	-9999	na	na					624		40			31178			4763					0	12540					1216	0	0						1394
2000	18	8.5 - 9.0	8.88	16.5	7.09167	12.9083	30.6	-6.8	1013.1	1013.73	565.4	155.4	20.3	5	63.8333	59					2400		30			40032			3009					0	5748					647	0	196						2498
1998	20	9.5 - 10.0	8.67	14.97	6.56667	11.1667	26.8	-6.2	1011.9	1014.5	594.7	158.6	25.7	17	78.5833	74.6667					720		1440		0	15390			2373					0	15648					706	0	350						1726
1995	22	10.5 - 11.0	8.73	16.93	6.19167	11.4083	28.2	-12.8	1012.7	1014.83	476.1	64.4	22.2	25	64.25	47			7944	0	1920		1960		16370	2200		282	2539			748		0	0					0	0	622					0	2652	0
1992	24	11.5 - 12.0	9.47	17.4	6.725	12.0167	29.2	-3.4	1013.9	1012.5	521.7	134.7	30	4	64.9167	55.6667			0	0	504		6619		41648		190	0	2339		0	917		0	0					0	0	668			210587	10149	1		42232
1990	26	12.5 - 13.0	9.92	16.47	7.16667	12.6833	31.2	-2.6	1012.2	1013.47	564	134.1	48.7	1	65.1667	59			18158	0	851				92398		64	271	2192	805	7	723	1233	0	0		1938	29753		0	0	1258			70980	2751	1	2754	91294
1988	28	13.5 - 14.0	8.97	16.3	6.36667	11.6833	25.8	-3.4	1011.5	1014.4	541.4	144.9	17.3	7	70	66.3333			14534	0	2079				129598		164	299		6839	11	797	1285	0	0		2202	26969	7347	0	0	227	4617		150840	2662	2	1395	60716
1986	30	14.5 - 15.0	7.53	15.2	4.94167	10.6917	26.4	-12.7	1012.3	1010.33	460.2	119.5	19.8	43	66.3333	59.6667				0		38	394		220509			127		7862	3	342	1100	0	0	2794	901	8844	6114	0	0	132	5890		201342	1342	1	2006	96112
1983	32	15.5 - 16.0	8.46	16.33	6.00833	11.4667	29	-8.4	1012.6	1012.53	458.1	155.5	23.3	27	66.9167	46.3333			798	911		541			286917								1272	0	0	18588	1805	43358	6317	0	0		20091		150096			822	105189
1980	34	16.5 - 17.0	7.68	15.47	5.18333	10.05	26	-11.6	1011.9	1012.6	612.7	273.4	26.4	79	69.3333	70		1020	2928	0		594	455		330812					4897			1057	0	0	17109	1869	16097	16793	0	0	859	23019				0	140	57979
1978	36	17.5 - 18.0	7.96	15.23	5.25	10.4833	27	-14	1011.2	1012.47	383.6	70	18.2	45	73.8333	67		9060	17311	0		989	8075	5798	287876					2906			1814	0	0	2543	2029		18559	0	0	520	25573	429			0.1	100	36893
1975	38	18.5 - 19.0	8.74	14.97	6.31667	11.9917	32.2	-5.6	1010.6	1016.3	538.2	163.1	25.3	4	60.75	43.3333		3276	7544	740		7327	326	6727	202816					1774				0	0	2277	635		18211	0	0	397	24466				0.1	30	9160
1972	40	19.5 - 20.0	8.41	16.47	5.80833	10.9417	28	-8.6	1014	1014.87	537.6	167.7	29.5	9	67.5833	54.6667		4560	11542			4822	0	7773	209543					3277				0	0	8	227		15046	0	0		13675						7374
1968	42	20.5 - 21.0	7.87	16.97	5.45	11.2333	27	-9.2	1014.3	1015.87	494.8	96.1	26.4	31	66.3333	50.3333		2083	10817			4275		4027	67958					4297				0	0				8107	0	0		11518						5071
1965	44	21.5 - 22.0	7.43	14.57	4.40833	10.225	22.7	-11.7	1011.4	1012.47	630.7	177.6	19.5	26	66.0833	60.3333		21876				10506		3191	68515					5908				0	0				14930	0	0		7454						3889
1961	46	22.5 - 23.0	8.93333	15.5333	6.075	11.9417	28.5	-9.8	1012.69	1013.2	634	188.8	27.3	11	66.4167	64		4077				189		3243	45678					513				0	0				10198	0	0		1536						874
1956	48	23.5 - 24.0	8.425	14.5667	3.93333	9.96667	25	-20	1014.9	1012.27	487.3	157.1	23.5	14	63.75	58.3333								92	28425					14129				0	0					0	0
1953	50	24.5 - 25.0	9.525	16.9667	6.31667	12.7	28.9	-10.8	1016.45	1009.57	554.4	209.4	22.7	1	69.6667	59
1950	52	25.5 - 26.0	8.55833	16.5333	5.35	11.6	27.3	-8.5	1010.02	1012.07	751.1	232.1	39	3	66.75	53.3333
1946	54	26.5 - 27.0	8.175	15.5	4.95	11.1833	26.7	-15.5	-999.9	1014.53	583.7	198.1	41	na	71.3333	66.3333
1942	56	27.5 - 28.0	6.63333	15.4333	3.05	9.78333	25.8	-22	1012.93	1010.57	508.5	185.2	40	na	67.3333	67
1938	58	28.5 - 29.0	9.03333	15.7	5.93333	12.4917	27.1	-20	1011.83	1012.53	535.5	148.8	25.5	na	64.6667	60
1934	60	29.5 - 30.0	9.30833	15.9	6.4	12.8417	27.8	-6.5	1011.42	1012.37	594.2	206.2	86	na	67.0833	55
1930	62	30.5 - 31.0	8.48333	15.9	5.68333	11.725	28.2	-6	1010.28	1008.73	566.1	172.3	28.5	na	67	55.3333
1925	64	31.5 - 32.0	8.26667	16.3667	4.94167	-999.9	-999.9	-12	-999.9	1011.47	522.5	90.6	31.5	na	61.5833	51.3333
1920	66	32.5 - 33.0	8.71667	15.8333	5.50833	11.9333	26.3	-6	1013.92	1011.53	505.2	118.3	16	na	67.6667	62
1916	68	33.5 - 34.0	8.03333	14.7333	5.05833	11.0167	25.1	-6.1	1008.45	1012.63	674.5	205.5	22.3	na	71.5833	63
[truncated: 399 more columns]
